# Supplementary material
Source: Springer Nature journal article supplement (https://www.springermedizin.de/resource/supplementary/12874_2010_519_MOESM7_ESM.pdf/9432502)

**Mean scores of ratings of items on the Active Commuting Route Environment Scale (ACRES)**

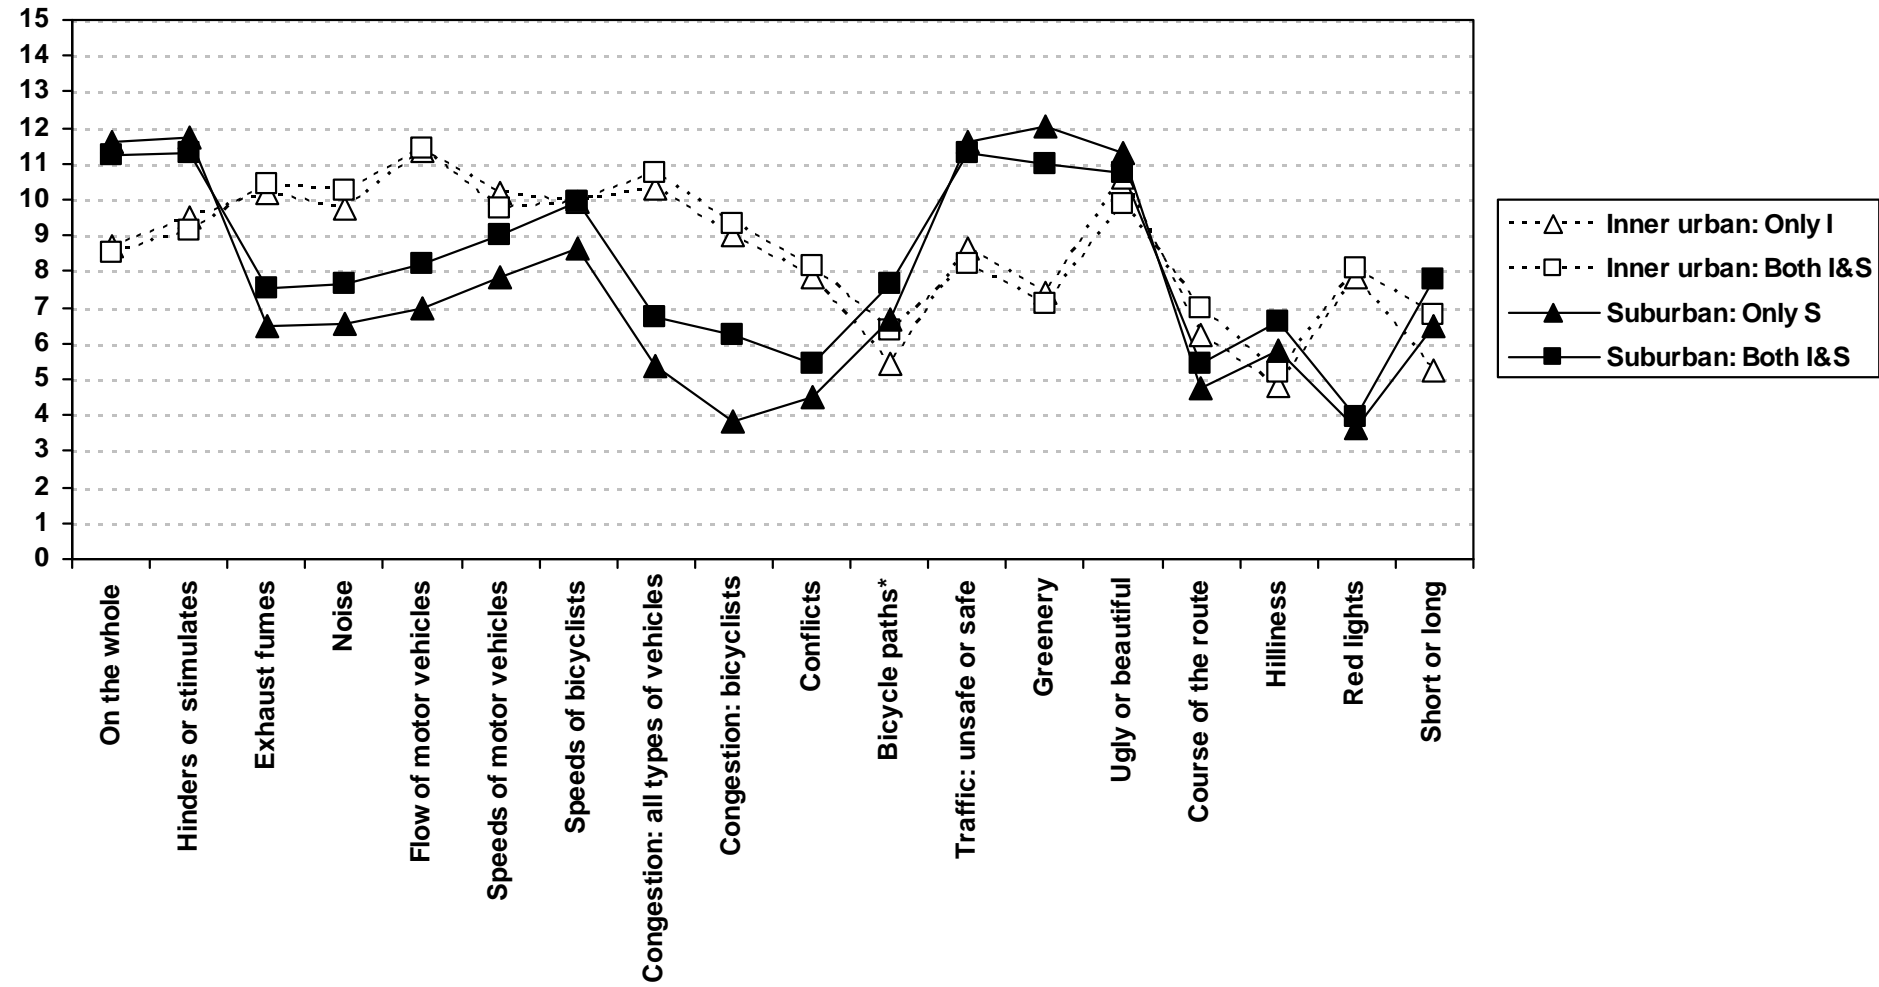

Supplement: MOESM7 [file 9432502]
